# Supplementary material for: Synergistic Responses Conferred by Concurrent Optical and Magnetic Stimulation are Attenuated by Simultaneous Exposure to Streptomycin: An Aminoglycoside Antibiotic Dilemma
Source: Preprints.org preprint supplement (doi:10.20944/preprints202406.0362.v1), 2024-06-07
Supplement: Supplementary file 1 [file supplementary]

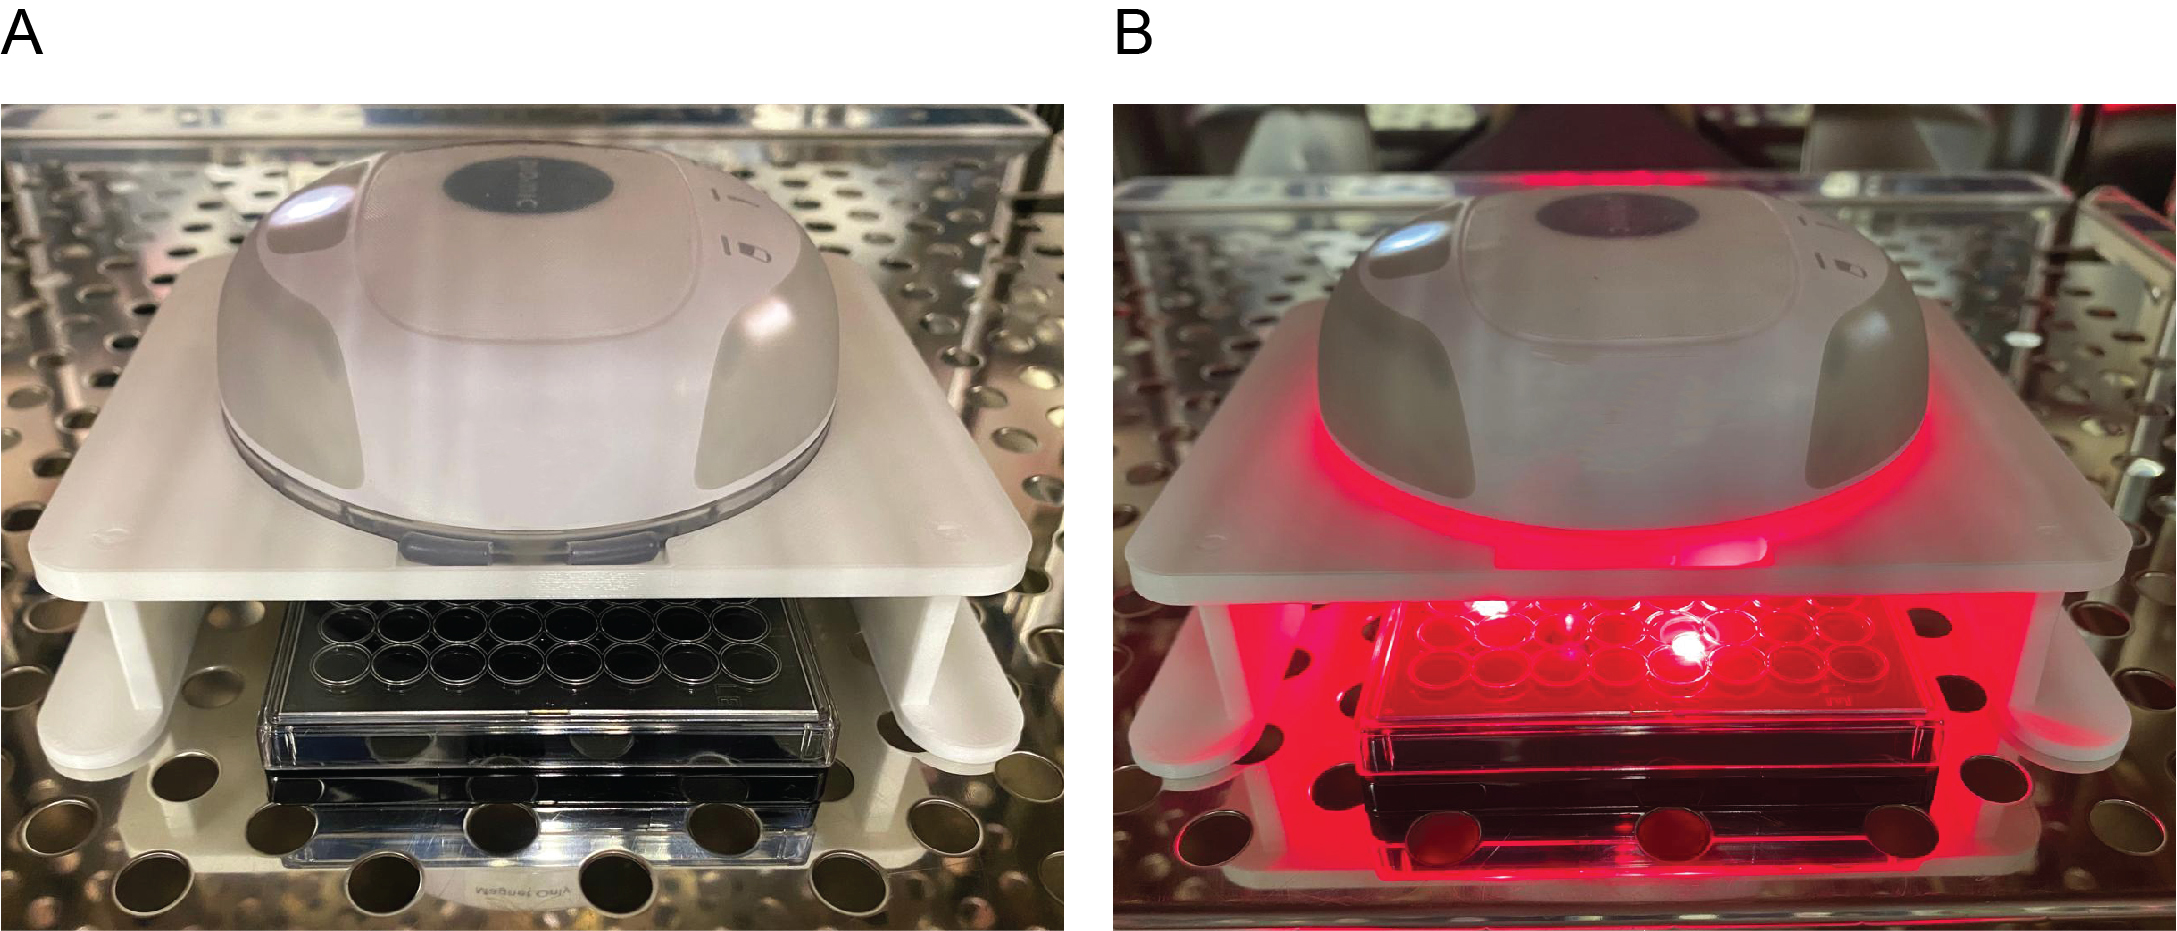


**Figure S1.** Plated cells subjected to light, magnetic fields, or both in a tissue culture incubator. (A) A typical COMS setup for magnetic fields alone or as a sham; (B) A typical COMS setup for light alone or in combination with magnetic fields.
